# Supplementary material for: Liquid Moisture Transport in Cotton Woven Fabrics with Different Weft Yarns
Source: MDPI journal article supplement (doi:10.3390/ma15186489), 2022-09-19
Supplement: s1 [file s1]

## RESULTS OF FABRICS' MEASUREMENT USING THE MMT M290

Table S1. Results of fabrics' measurement using the MMT M290 for the woven fabric with the 100 tex weft yarn.

| Repetition | Top             | Bottom          | Top                | Bottom             | Top                  | Bottom               | Top                | Bottom             | Accumulative<br>One-way transport<br>index (%) | OMMC  |
|------------|-----------------|-----------------|--------------------|--------------------|----------------------|----------------------|--------------------|--------------------|------------------------------------------------|-------|
|            | Wetting<br>Time | Wetting<br>Time | Absorption<br>Rate | Absorption<br>Rate | Max Wetted<br>Radius | Max Wetted<br>Radius | Spreading<br>Speed | Spreading<br>Speed |                                                |       |
|            | [s]             | [s]             | [%/s]              | [%/s]              | [mm]                 | [mm]                 | [mm/sec]           | [mm/sec]           |                                                |       |
| BR 7-1     | 3.556           | 3.837           | 65.6045            | 58.6362            | 20                   | 20                   | 3.9934             | 4.1385             | -76.4073                                       | 0.385 |
| BR 7-2     | 3.837           | 4.493           | 66.2492            | 60.347             | 20                   | 20                   | 3.9052             | 3.8135             | -79.1167                                       | 0.374 |
| BR 7-3     | 3.744           | 3.744           | 63.8628            | 56.3581            | 20                   | 20                   | 3.7755             | 3.6355             | -51.8593                                       | 0.348 |
| BR 7-4     | 4.212           | 4.119           | 67.5196            | 58.4256            | 20                   | 20                   | 3.6155             | 3.4517             | -69.0119                                       | 0.339 |
| BR 7-5     | 3.464           | 3.932           | 62.882             | 57.9553            | 20                   | 20                   | 3.9939             | 3.7474             | -70.0305                                       | 0.362 |
| BR 7-6     | 3.369           | 3.557           | 63.4167            | 55.9496            | 20                   | 20                   | 3.6045             | 3.5093             | -73.2789                                       | 0.337 |
| BR 7-7     | 3.557           | 3.65            | 64.1814            | 57.6621            | 20                   | 20                   | 3.7172             | 3.7956             | -108.2979                                      | 0.365 |
| BR 7-8     | 3.744           | 3.744           | 65.6753            | 57.2176            | 20                   | 20                   | 3.843              | 3.8404             | -68.0552                                       | 0.368 |
| BR 7-9     | 3.744           | 3.931           | 65.6691            | 58.5517            | 20                   | 20                   | 3.6709             | 3.7371             | -61.8223                                       | 0.363 |
| BR 7-10    | 3.651           | 3.744           | 66.2878            | 59.7745            | 20                   | 20                   | 3.9142             | 3.9047             | -75.4263                                       | 0.38  |

Table S2. Results of fabrics' measurement using the MMT M290 for the woven fabric with the 60 tex weft yarn.

| Repetition | Top             | Bottom          | Top                | Bottom             | Top                     | Bottom                  | Top                | Bottom             | Accumulative<br>One-way transport<br>index (%) | OMMC  |
|------------|-----------------|-----------------|--------------------|--------------------|-------------------------|-------------------------|--------------------|--------------------|------------------------------------------------|-------|
|            | Wetting<br>Time | Wetting<br>Time | Absorption<br>Rate | Absorption<br>Rate | Max<br>Wetted<br>Radius | Max<br>Wetted<br>Radius | Spreading<br>Speed | Spreading<br>Speed |                                                |       |
|            | [s]             | [s]             | [%/s]              | [%/s]              | [mm]                    | [mm]                    | [mm/sec]           | [mm/sec]           |                                                |       |
| BR 8-1     | 3.089           | 2.996           | 62.5908            | 55.5181            | 20                      | 20                      | 4.7029             | 4.705              | -84.1718                                       | 0.376 |
| BR 8-2     | 3.557           | 3.182           | 62.8143            | 53.9805            | 20                      | 20                      | 4.4663             | 4.1868             | -83.8542                                       | 0.372 |
| BR 8-3     | 3.183           | 3.37            | 62.5641            | 56.575             | 20                      | 20                      | 4.668              | 4.3909             | -97.8971                                       | 0.379 |
| BR 8-4     | 2.902           | 3.276           | 62.301             | 56.3407            | 20                      | 20                      | 4.7683             | 4.7409             | -71.4952                                       | 0.379 |
| BR 8-5     | 3.276           | 3.089           | 62.8926            | 54.6036            | 20                      | 20                      | 4.3046             | 4.2194             | -108.1773                                      | 0.374 |
| BR 8-6     | 3.369           | 3.276           | 61.2444            | 55.6948            | 20                      | 20                      | 4.4684             | 4.2486             | -57.2665                                       | 0.377 |
| BR 8-7     | 2.901           | 3.182           | 60.2022            | 54.0153            | 20                      | 20                      | 4.615              | 4.4331             | -87.4954                                       | 0.372 |
| BR 8-8     | 2.995           | 3.182           | 59.7701            | 53.3941            | 20                      | 20                      | 4.5775             | 4.5535             | -78.389                                        | 0.371 |
| BR 8-9     | 3.369           | 3.556           | 59.9599            | 55.51              | 20                      | 20                      | 4.3063             | 4.1719             | -74.2884                                       | 0.376 |
| BR 8-10    | 3.276           | 3.276           | 61.6106            | 54.5554            | 20                      | 20                      | 4.2483             | 4.0948             | -76.6069                                       | 0.374 |

Table S3. Results of fabrics' measurement using the MMT M290 for the woven fabric with the 50 tex weft yarn.

| Repetition | Top             | Bottom          | Top                | Bottom             | Top                     | Bottom                  | Top                | Bottom             | Accumulative<br>One-way transport<br>index (%) | OMMC  |
|------------|-----------------|-----------------|--------------------|--------------------|-------------------------|-------------------------|--------------------|--------------------|------------------------------------------------|-------|
|            | Wetting<br>Time | Wetting<br>Time | Absorption<br>Rate | Absorption<br>Rate | Max<br>Wetted<br>Radius | Max<br>Wetted<br>Radius | Spreading<br>Speed | Spreading<br>Speed |                                                |       |
|            | [s]             | [s]             | [%/s]              | [%/s]              | [mm]                    | [mm]                    | [mm/sec]           | [mm/sec]           |                                                |       |
| BR 9-1     | 3.182           | 3.276           | 62.4974            | 57.0064            | 20                      | 20                      | 4.535              | 4.4053             | -73.6227                                       | 0.381 |
| BR 9-2     | 3.182           | 3.276           | 63.4935            | 57.5354            | 20                      | 20                      | 4.5046             | 4.454              | -36.9277                                       | 0.397 |
| BR 9-3     | 3.276           | 3.182           | 63.988             | 57.2604            | 20                      | 20                      | 4.5845             | 4.5974             | -85.5781                                       | 0.381 |
| BR 9-4     | 3.37            | 3.464           | 64.0398            | 57.3242            | 25                      | 20                      | 4.7824             | 4.3547             | -72.9212                                       | 0.382 |
| BR 9-5     | 3.463           | 3.463           | 65.5972            | 58.4374            | 25                      | 25                      | 4.9388             | 4.6625             | -81.523                                        | 0.385 |
| BR 9-6     | 3.089           | 3.463           | 62.8772            | 58.4286            | 25                      | 20                      | 4.8771             | 4.4147             | -75.4813                                       | 0.385 |
| BR 9-7     | 3.37            | 2.995           | 64.2579            | 55.8351            | 25                      | 20                      | 4.7635             | 4.3824             | -84.6211                                       | 0.377 |
| BR 9-8     | 3.089           | 2.901           | 62.0607            | 55.782             | 25                      | 25                      | 5.0007             | 4.7703             | -91.3344                                       | 0.377 |
| BR 9-9     | 3.089           | 3.182           | 62.7055            | 56.4041            | 20                      | 20                      | 4.413              | 4.2288             | -81.4838                                       | 0.379 |
| BR 9-10    | 3.183           | 3.37            | 62.917             | 56.3657            | 20                      | 20                      | 4.4274             | 4.3244             | -77.0636                                       | 0.379 |

Table S4. Results of fabrics' measurement using the MMT M290 for the woven fabric with the 40 tex weft yarn.

| Repetition | Top             | Bottom          | Top                | Bottom             | Top                  | Bottom               | Top                | Bottom             | Accumulative<br>One-way transport index<br>(%) | OMMC  |
|------------|-----------------|-----------------|--------------------|--------------------|----------------------|----------------------|--------------------|--------------------|------------------------------------------------|-------|
|            | Wetting<br>Time | Wetting<br>Time | Absorption<br>Rate | Absorption<br>Rate | Max Wetted<br>Radius | Max Wetted<br>Radius | Spreading<br>Speed | Spreading<br>Speed |                                                |       |
|            | [s]             | [s]             | [%/s]              | [%/s]              | [mm]                 | [mm]                 | [mm/sec]           | [mm/sec]           |                                                |       |
| BR 11-1    | 2.995           | 3.182           | 63.0848            | 58.1283            | 25                   | 25                   | 5.1011             | 5.1884             | -63.7195                                       | 0.384 |
| BR 11-2    | 3.089           | 3.463           | 64.3871            | 59.7731            | 20                   | 20                   | 4.9591             | 5.1589             | -43.6535                                       | 0.395 |
| BR 11-3    | 3.182           | 3.089           | 64.2515            | 58.0324            | 25                   | 25                   | 5.3288             | 5.1153             | -41.0109                                       | 0.393 |
| BR 11-4    | 3.182           | 3.276           | 63.8529            | 57.9144            | 25                   | 20                   | 5.2069             | 4.6028             | -71.5999                                       | 0.383 |
| BR 11-5    | 2.715           | 2.996           | 64.2552            | 57.8059            | 25                   | 20                   | 5.6268             | 5.0391             | -78.3892                                       | 0.383 |
| BR 11-6    | 3.276           | 3.276           | 64.0911            | 57.7323            | 20                   | 25                   | 4.553              | 4.843              | -57.2108                                       | 0.383 |
| BR 11-7    | 2.901           | 3.276           | 62.6445            | 58.5847            | 20                   | 25                   | 4.7868             | 5.2282             | -71.205                                        | 0.385 |
| BR 11-8    | 2.901           | 3.182           | 63.4137            | 56.7715            | 25                   | 20                   | 5.5703             | 4.9134             | -81.3153                                       | 0.38  |
| BR 11-9    | 2.714           | 3.089           | 62.093             | 56.1664            | 25                   | 25                   | 5.2712             | 5.1409             | -78.8948                                       | 0.378 |
| BR 11-10   | 3.276           | 3.183           | 64.2112            | 57.1833            | 25                   | 20                   | 4.8794             | 4.4229             | -77.1238                                       | 0.381 |

Table S5. Results of fabrics' measurement using the MMT M290 for the woven fabric with the 30 tex weft yarn.

| Repetition | Top             | Bottom          | Top                | Bottom             | Top                  | Bottom               | Top                | Bottom             | Accumulative<br>One-way transport index<br>(%) | OMMC  |
|------------|-----------------|-----------------|--------------------|--------------------|----------------------|----------------------|--------------------|--------------------|------------------------------------------------|-------|
|            | Wetting<br>Time | Wetting<br>Time | Absorption<br>Rate | Absorption<br>Rate | Max Wetted<br>Radius | Max Wetted<br>Radius | Spreading<br>Speed | Spreading<br>Speed |                                                |       |
|            | [s]             | [s]             | [%/s]              | [%/s]              | [mm]                 | [mm]                 | [mm/sec]           | [mm/sec]           |                                                |       |
| BR 12-1    | 2.621           | 2.902           | 62.278             | 56.2794            | 25                   | 25                   | 5.9089             | 5.8035             | -106.6793                                      | 0.379 |
| BR 12-2    | 3.183           | 3.37            | 67.9426            | 60.1095            | 20                   | 25                   | 5.2147             | 5.6878             | -86.5794                                       | 0.389 |
| BR 12-3    | 3.089           | 2.996           | 67.2631            | 59.1214            | 25                   | 25                   | 5.7326             | 6.1471             | -78.0841                                       | 0.386 |
| BR 12-4    | 3.183           | 3.183           | 66.4424            | 58.6782            | 25                   | 25                   | 5.581              | 5.6137             | -84.6901                                       | 0.385 |
| BR 12-5    | 2.621           | 3.089           | 64.3919            | 58.9187            | 25                   | 30                   | 5.7001             | 5.6586             | -79.2829                                       | 0.386 |
| BR 12-6    | 2.901           | 2.995           | 65.4818            | 58.6601            | 25                   | 30                   | 5.9279             | 6.0218             | -76.4352                                       | 0.385 |
| BR 12-7    | 2.808           | 2.808           | 65.1712            | 58.2727            | 25                   | 25                   | 5.8227             | 5.7065             | -81.8325                                       | 0.384 |
| BR 12-8    | 2.996           | 2.996           | 66.097             | 59.5591            | 25                   | 25                   | 5.9164             | 5.6627             | -80.6133                                       | 0.388 |
| BR 12-9    | 2.527           | 2.808           | 65.3563            | 59.0529            | 30                   | 30                   | 6.3166             | 6.0876             | -97.609                                        | 0.386 |
| BR 12-10   | 2.528           | 2.902           | 65.7379            | 59.6323            | 25                   | 25                   | 6.2184             | 5.9429             | -96.5028                                       | 0.388 |
